# Supplementary material for: The Storage Conditions of High-Fat Diet Are the Key Factors for Diet-Induced Obesity and Liver Damage
Source: MDPI journal article supplement (doi:10.3390/nu14112222), 2022-05-26
Supplement: s1 [file s1]

**Supplementary information: The storage conditions of high fat diet are the key factors for diet induced obesity and liver damage**

Chuanyou Yi<sup>1,\*</sup>, Dandan Li<sup>1,\*</sup>, Xiao Guo<sup>1,\*</sup>, Jinhui Wang<sup>1</sup>, Cenxi Liu<sup>1</sup>, Guangxing Lu<sup>1</sup>, Yan Sun<sup>2</sup>, He Huang<sup>1,#</sup>, Shangyu Hong<sup>1,#</sup>, Jin Li<sup>1,#</sup>

<sup>1</sup> State Key Laboratory of Genetic Engineering, School of Life Sciences, Human Phenome Institute, and Institute of metabolism and integrative biology, Fudan University, Shanghai, 200438, China

<sup>2</sup> Masonic medical research institute, 2150 Bleecker St, Utica, NY 13501, USA

\* Equal contribution; # Correspondence: hehuang@fudan.edu.cn (H.H.), shangyuhong@fudan.edu.cn (S.H.) or li\_jin\_lifescience@fudan.edu.cn (J.L.)

Key word: high fat diet; storage condition; obesity; liver damage; medium chain triglyceride; unfolded protein response; NNMT.

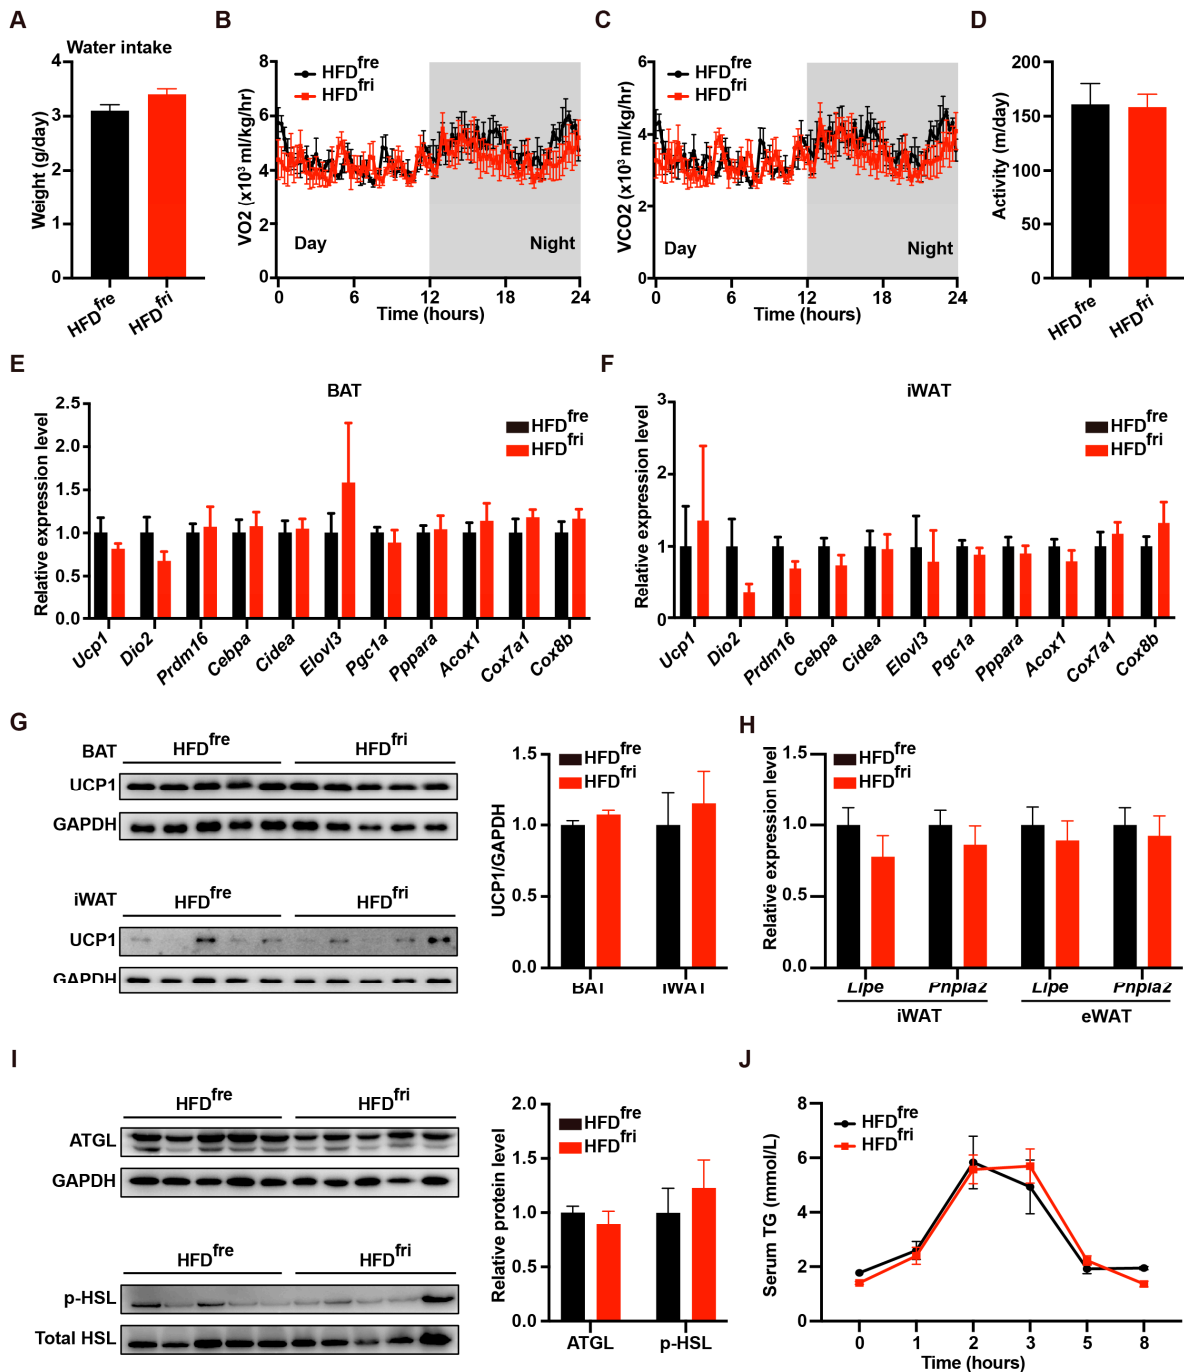

**Supplementary Figure S1. Physiological changes of mice fed by high fat diet (HFD) stored in different conditions.**

**A-D.** Analysis of metabolic features of mice fed by high fat diet (HFD) stored in the freezer (fre) (HFD<sup>fre</sup>) or HFD stored in the fridge (fri) (HFD<sup>fri</sup>). The features include (A) water intake ( $n=9$  for each group); (B) O<sub>2</sub> consumption rate at each time point ( $n=4$  for each group); (C) CO<sub>2</sub> production rate at each time point ( $n=4$  for each group) and (D) physical activity ( $n=4$  for each group); **E.** The expression of thermogenic genes in brown adipose tissue (BAT) ( $n=10$  for each group); **F.** The expression of

*thermogenic genes in inguinal white adipose tissue (iWAT) (n=10 for each group); G. The expression of uncoupling protein (UCP1) protein in BAT and iWAT (n=5 for each group); H. The expression of lipolytic genes in iWAT and epididymal white adipose tissue (eWAT) (n=10 for each group); I. The expression of lipolytic proteins in iWAT and eWAT (n=5 for each group); J. The oral lipid tolerance test (OLTT) results of mice fed by HFD stored in different conditions (p=0.8452 from two-way ANOVA, n=10 for each group). Eight-week-old male mice were fed by HFD<sup>f<sub>re</sub></sup> and HFD<sup>f<sub>ri</sub></sup> for 7 weeks. The adjusted p-value from multiple comparison test and the p-value from student t-test were provided in the **Supplementary Table S3**.*

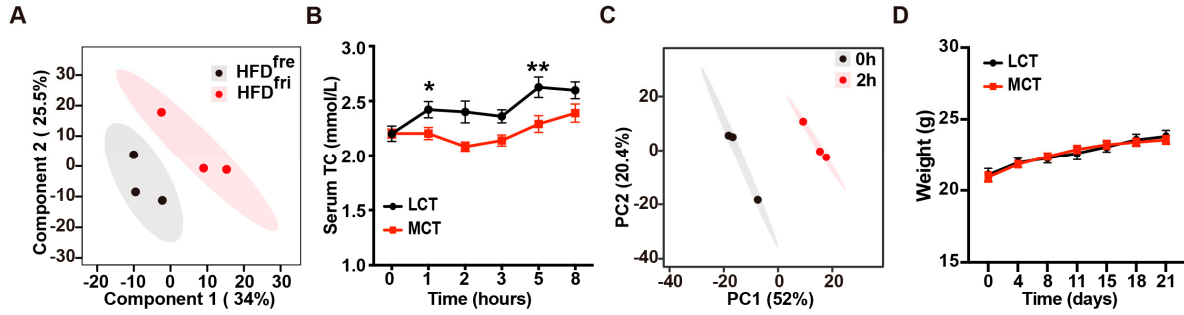

**Supplementary Figure S2. The lipid composition in high fat diet (HFD) stored in the fridge (fri) (HFD<sup>fri</sup>).**

**A.** The partial least squares discrimination analysis (PLS-DA) of lipidomics analysis for HFD ( $n=3$  for each group); **B.** The serum total cholesterol (TC) concentration in oral lipid tolerance test (OLTT) in eight-week-old male mice fed by chow diet ( $p<0.0001$  from two-way ANOVA,  $n=10$  for each group); **C.** The principal component analysis (PCA) of serum lipidomics in the initial and two-hour time point of OLTT ( $n=3$  for each group); **D.** The body weight of eight-week-old male mice fed by chow diet and medium chain triglyceramide (MCT) enriched oil or sunflower oil for three weeks ( $p=0.9209$  from two-way ANOVA and  $n=10$  for each group). The adjusted  $p$ -value from multiple comparison test were indicated as \*,  $p<0.05$ ; \*\*,  $p<0.01$ . The results of student  $t$ -test were provided in the **Supplementary Table S3**.

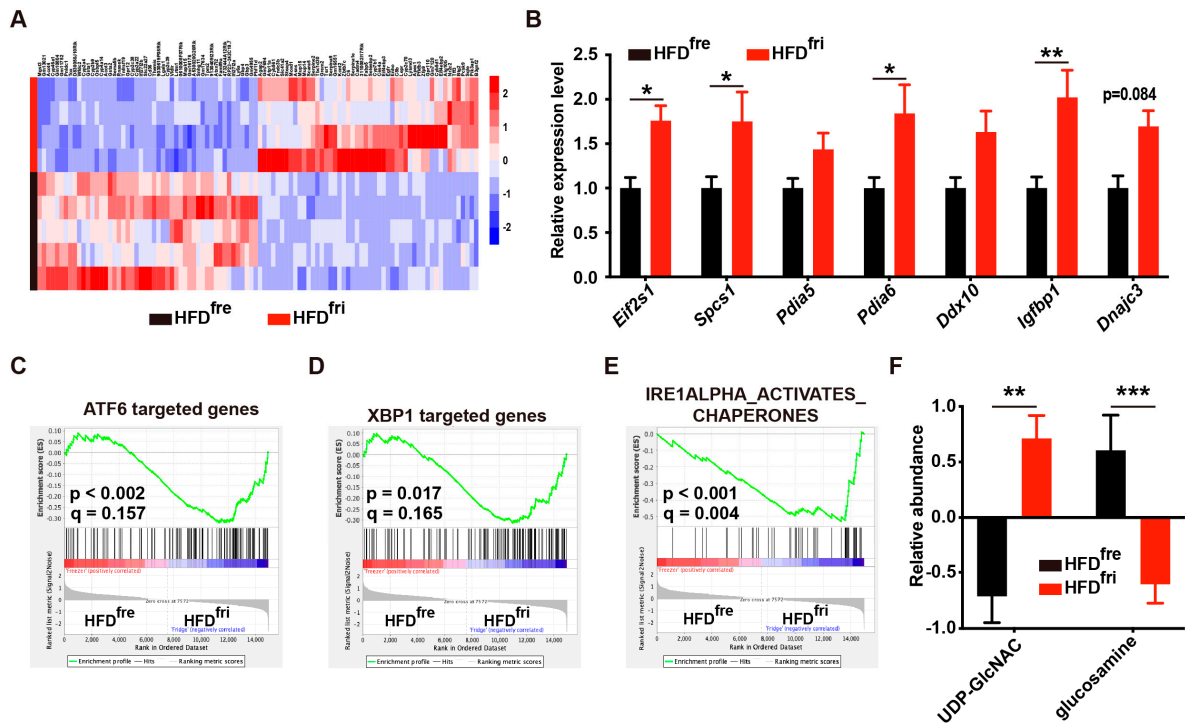

### Supplementary Figure S3. Transcriptional and metabolic changes in the liver.

**A.** The heatmap of the RNA-seq data (high fat diet (HFD) stored in the freezer (fre) (HFD<sup>fre</sup>),  $n=5$ ; HFD stored in the fridge (fri) (HFD<sup>fri</sup>),  $n=4$ ); **B-F.** Transcriptional changes and metabolic changes of liver from mice fed by HFD. These include (**B**) RT-qPCR results of genes related to unfolded protein response (UPR) ( $p < 0.0001$  from two-way ANOVA; HFD<sup>fre</sup>,  $n=8$ ; HFD<sup>fri</sup>,  $n=7$ ); (**C**) Gene Set Enrichment Analysis (GSEA) result for activating transcription factor 6 (ATF6) associated gene set (HFD<sup>fre</sup>,  $n=5$ ; HFD<sup>fri</sup>,  $n=4$ ); (**D**) X-box binding protein 1 (XBP1) associated gene set set (HFD<sup>fre</sup>,  $n=5$ ; HFD<sup>fri</sup>,  $n=4$ ); (**E**) Endoplasmic reticulum (ER) related chaperon associated gene set set (HFD<sup>fre</sup>,  $n=5$ ; HFD<sup>fri</sup>,  $n=4$ ) and (**F**) Relative abundance of metabolites in the liver set ( $n=10$  for each group). Eight-week-old male mice were fed by HFD<sup>fre</sup> and HFD<sup>fri</sup> for 7 weeks. The adjusted  $p$ -value from multiple comparison test were indicated as \*,  $p < 0.05$ ; \*\*,  $p < 0.01$ . The results of student  $t$ -test were provided in the **Supplementary Table S3**.

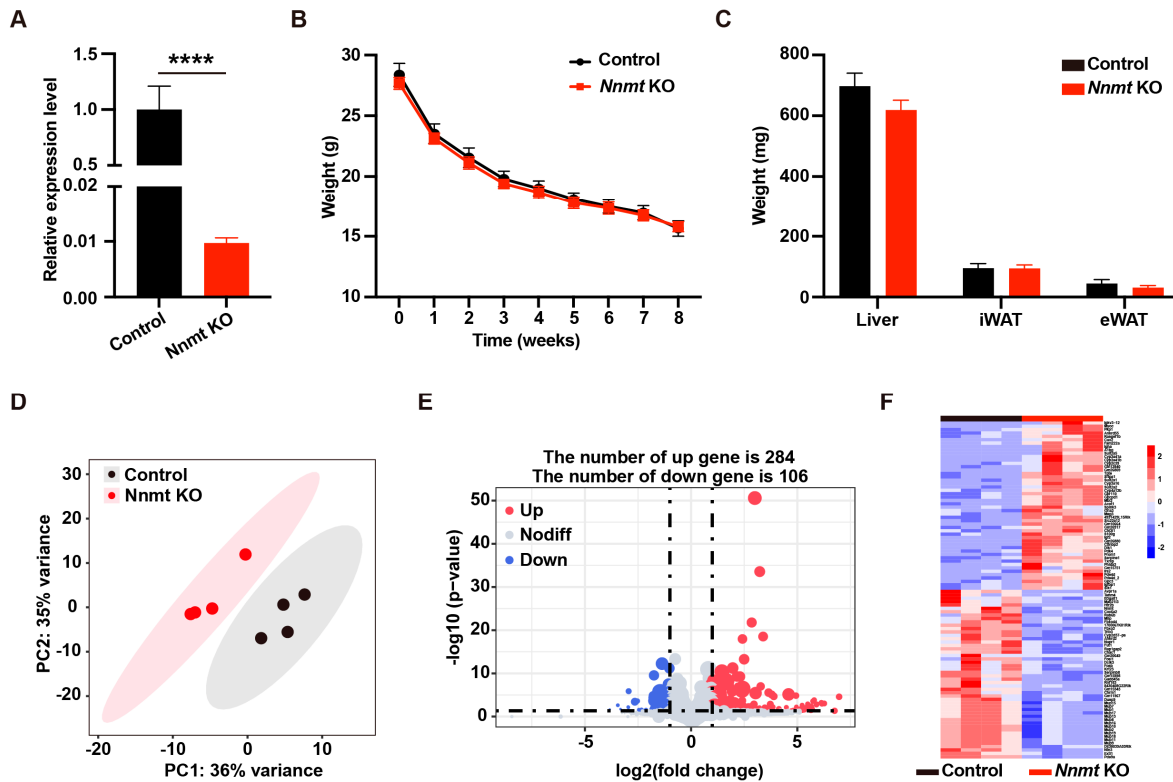

**Supplementary Figure S4. The effects of nicotinamide N-methyl transferase knockout (*Nnmt* KO) in the liver.**

**A.** Expression of nicotinamide N-methyl transferase (*Nnmt*) gene by RT-qPCR ( $n=3$  for each group); **B.** Body weight ( $p=0.2553$  from two-way ANOVA; Control,  $n=6$ ; nicotinamide N-methyl transferase knockout (*Nnmt* KO),  $n=7$ ); **C.** Absolute weight of liver, inguinal white adipose tissue (iWAT) and epididymal white adipose tissue (eWAT) ( $p=0.1199$  from two-way ANOVA; Control,  $n=6$ ; *Nnmt* KO,  $n=7$ ); **D.** Principal Component Analysis (PCA) ( $n=4$  for each group); **E.** Volcano plot ( $n=4$  for each group); **F.** Heat map of top differentially expressed genes in the liver of male control or *Nnmt* KO mice fed by methionine and choline deficient (MCD) diet side by side for eight weeks ( $n=4$  for each group). \*\*\*\*,  $p<0.0001$  from student *t*-test. The adjusted *p*-value from multiple comparison test and the results of student *t*-test were provided in the **Supplementary Table S3**.
